# Supplementary material for: Suicidal ideation and suicide attempts in eight low- and middle-income countries: A comparison of national surveys
Source: Research Square preprint supplement (doi:10.21203/rs.3.rs-5507229/v1), 2025-04-28
Supplement: Supplementary file 1 [file 3568b577fadd89b5867d67ad.docx]

**Supplementary material 1.** *Characteristics of all participants before applying the inclusion criteria.*

|  |  | Argelia | | Azerbaijan | | Estawani | | Guyana | | Kiribati | | Malawi | | Tavalu | | Zambia | |
| --- | --- | --- | --- | --- | --- | --- | --- | --- | --- | --- | --- | --- | --- | --- | --- | --- | --- |
|  |  | n | % | n | % | n | % | n | % | n | % | n | % | n | % | n | % |
| Sex | Men | 3082 | 44.1 | 1136 | 40.6 | 1230 | 34.8 | 1068 | 40.1 | 986 | 45.7 | 1485 | 35.5 | 527 | 45.6 | 1614 | 37.5 |
|  | Women | 3907 | 55.9 | 1665 | 59.4 | 2304 | 65.2 | 1594 | 59.9 | 1170 | 54.3 | 2702 | 64.5 | 628 | 54.4 | 2688 | 62.5 |
| Age range | 15-17 | 0 | 0 | 0 | 0 | 275 | 7.8 | 0 | 0 | 0 | 0 | 0 | 0 | 0 | 0 | 0 | 0 |
|  | 18-29 | 1508 | 21.6 | 480 | 17.1 | 1168 | 33.1 | 730 | 27.4 | 682 | 31.7 | 1371 | 32.7 | 307 | 26.6 | 1620 | 37.7 |
|  | 30-44 | 2747 | 39.3 | 785 | 28 | 1013 | 28.7 | 871 | 32.7 | 770 | 35.7 | 1548 | 37 | 329 | 28.5 | 1513 | 35.2 |
|  | 45-59 | 1929 | 27.6 | 1075 | 38.4 | 705 | 20 | 719 | 27 | 527 | 24.4 | 855 | 20.4 | 382 | 33.1 | 785 | 18.3 |
|  | 60-69 | 805 | 11.5 | 461 | 16.5 | 373 | 10.6 | 342 | 12.9 | 177 | 8.2 | 413 | 9.9 | 137 | 11.8 | 384 | 8.8 |
| Level education | Without formal education | 2149 | 30.8 | 33 | 1.2 | 1026 | 33.2 | 263 | 9.9 | 152 | 7.1 | 1899 | 45.4 | 45 | 3.9 | 425 | 10 |
| Elementary school complete | 1639 | 23.5 | 61 | 2.2 | 831 | 23.5 | 1185 | 44.5 | 672 | 31.2 | 1227 | 29.3 | 487 | 42.2 | 2157 | 50.1 |
| High school complete | 2124 | 30.4 | 1466 | 52.3 | 1150 | 32.6 | 1115 | 41.9 | 1234 | 57.2 | 1057 | 25.2 | 603 | 52.2 | 1390 | 32.3 |
| University education | 953 | 13.6 | 1239 | 44.2 | 271 | 7.7 | 97 | 3.6 | 70 | 3.3 | 0 | 0 | 18 | 1.6 | 327 | 7.5 |
| Missing | 124 | 1.7 | 2 | 0.1 | 256 | 7.2 | 2 | 0.1 | 28 | 1.2 | 4 | 0.1 | 2 | 0.1 | 3 | 0.1 |
| Status civil | Never married | 1706 | 24.4 | 367 | 13.1 | 1482 | 41.9 | 786 | 29.5 | 329 | 15.3 | 418 | 10 | 219 | 19 | 934 | 21.7 |
| Currently married | 4805 | 68.8 | 2027 | 72.4 | 1387 | 39.3 | 940 | 35.3 | 1508 | 69.9 | 2620 | 62.6 | 847 | 73.3 | 2621 | 60.9 |
| Separated | 30 | 0.4 | 41 | 1.5 | 66 | 1.9 | 125 | 4.7 | 42 | 2 | 243 | 5.8 | 11 | 0.9 | 149 | 3.5 |
| Divorced | 185 | 2.7 | 56 | 2 | 21 | 0.6 | 77 | 2.9 | 35 | 1.6 | 257 | 6.1 | 24 | 2.1 | 259 | 6 |
| Widowed | 244 | 3.5 | 260 | 9.3 | 224 | 6.3 | 132 | 5 | 134 | 6.2 | 366 | 8.7 | 54 | 4.7 | 323 | 7.5 |
| Missing | 19 | 0.2 | 50 | 1.7 | 354 | 10 | 602 | 22.6 | 108 | 5 | 283 | 6.8 | 0 | 0 | 16 | 0.4 |
| Current smoking | Yes | 963 | 13.8 | 561 | 20 | 191 | 5.4 | 344 | 12.9 | 983 | 45.6 | 360 | 8.6 | 396 | 34.3 | 475 | 11.1 |
| No | 6006 | 86 | 2240 | 80 | 3090 | 87.4 | 2318 | 87.1 | 1155 | 53.6 | 3827 | 91.4 | 759 | 65.7 | 3826 | 88.9 |
| Missing | 20 | 0.2 | 0 | 0 | 253 | 7.2 | 0 | 0 | 18 | 0.8 | 0 | 0 | 0 | 0 | 1 | 0 |
| Ever drank alcohol | Yes | 564 | 8.1 | 755 | 26.9 | 822 | 23.3 | 1791 | 67.3 | 603 | 28 | 1052 | 25.1 | 278 | 24.1 | 1398 | 32.5 |
| No | 6399 | 91.6 | 2046 | 73.1 | 2458 | 69.6 | 871 | 32.7 | 1534 | 71.2 | 3135 | 74.9 | 877 | 75.9 | 2903 | 67.5 |
| Missing | 26 | 0.3 | 0 | 0 | 254 | 7.1 | 0 | 0 | 19 | 0.9 | 0 | 0 | 0 | 0 | 1 | 0 |
| Drank alcohol in past 12 months | Yes | 191 | 2.8 | 507 | 18.1 | 544 | 15.4 | 1369 | 51.4 | 356 | 16.5 | 727 | 17.4 | 242 | 21 | 1047 | 24.3 |
| No | 373 | 5.3 | 248 | 8.9 | 278 | 7.9 | 422 | 15.9 | 246 | 11.4 | 325 | 7.8 | 36 | 3.1 | 351 | 8.2 |
| Missing | 6425 | 91.9 | 2046 | 73 | 2712 | 76.7 | 871 | 32.7 | 1554 | 72.1 | 3135 | 74.8 | 877 | 75.9 | 2904 | 67.5 |
| Vigorous activity at work | Yes | 1423 | 20.4 | 312 | 11.1 | 1227 | 34.8 | 615 | 23.1 | 506 | 23.5 | 3555 | 84.9 | 394 | 34.1 | 2765 | 64.3 |
| No | 5537 | 79.2 | 2489 | 88.9 | 2051 | 58 | 2047 | 76.9 | 1619 | 75.1 | 632 | 15.1 | 758 | 65.6 | 1536 | 35.7 |
| Missing | 29 | 0.4 | 0 | 0 | 256 | 7.2 | 0 | 0 | 31 | 1.4 | 0 | 0 | 3 | 0.3 | 1 | 0 |
| Suicidal ideation | Yes | 211 | 3 | 41 | 1.5 | 310 | 8.8 | 118 | 4.4 | 185 | 8.6 | 308 | 7.4 | 57 | 5 | 347 | 8.1 |
| No | 6680 | 95.6 | 2721 | 97.1 | 2968 | 84 | 2540 | 95.4 | 1919 | 89 | 3848 | 91.9 | 1090 | 94.4 | 3924 | 91.3 |
| Missing | 98 | 1.4 | 39 | 1.4 | 256 | 7.2 | 4 | 0.2 | 52 | 2.4 | 31 | 0.7 | 8 | 0.8 | 31 | 0.6 |
| Suicide attempt in lifetime | Yes | 60 | 0.8 | 30 | 1.1 | 115 | 3.3 | 85 | 3.2 | 101 | 4.7 | 36 | 0.9 | 12 | 1 | 99 | 2.3 |
| No | 6836 | 97.9 | 2730 | 97.5 | 3161 | 89.5 | 2572 | 96.6 | 2005 | 93 | 4119 | 98.4 | 1133 | 98.1 | 4156 | 96.6 |
| Missing | 93 | 1.3 | 41 | 1.4 | 258 | 7.2 | 5 | 0.2 | 50 | 2.3 | 32 | 0.7 | 10 | 0.9 | 47 | 1.1 |
| Close family member attempted suicide | Yes | 94 | 1.3 | 21 | 0.8 | 341 | 9.8 | 276 | 10.4 | 168 | 7.8 | 172 | 4.1 | 71 | 6.2 | 451 | 10.5 |
| No | 6799 | 97.3 | 2727 | 97.4 | 2934 | 83 | 2349 | 88.2 | 1936 | 89.8 | 3975 | 94.9 | 1077 | 93.3 | 3819 | 88.8 |
| Missing | 96 | 1.4 | 53 | 1.8 | 259 | 7.2 | 37 | 1.4 | 52 | 2.4 | 40 | 1 | 7 | 0.5 | 32 | 0.7 |
| Close family member died from suicide | Yes | 40 | 0.6 | 11 | 0.4 | 247 | 7 | 253 | 9.5 | 128 | 5.9 | 96 | 2.3 | 58 | 5 | 252 | 5.9 |
| No | 6856 | 98.2 | 10 | 0.4 | 3030 | 85.7 | 2383 | 89.5 | 1977 | 91.7 | 76 | 1.8 | 1092 | 94.6 | 199 | 4.6 |
| Missing | 93 | 1.2 | 2780 | 99.2 | 257 | 7.3 | 26 | 1 | 51 | 2.4 | 4015 | 95.9 | 5 | 0.4 | 3851 | 89.5 |

Note: All analyses considered the complex sampling weighting factor by country.
